# Supplementary material for: Expanded three-channel mid/side coding for three-dimensional multichannel audio systems
Source: Springer Nature journal article supplement (doi:10.1186/1687-4722-2014-10), 2014-03-24

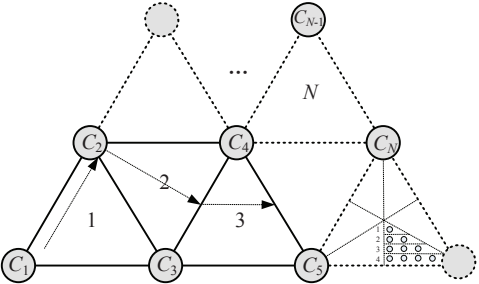

Supplement: 13636_2013_105_MOESM4_ESM.pdf [file 13636_2013_105_MOESM4_ESM.pdf]
